# Supplementary material for: A novel multielement nanocomposite with ultrahigh rate capacity and durable performance for sodium-ion battery anodes
Source: Royal Society of Chemistry journal article supplement (doi:10.1039/d0ta04349d), 2020-01-01
Supplement: d0ta04349d1.pdf [file d0ta04349d1.pdf]

## Electronic Supplementary Information

### Novel Multielement Nanocomposite with Ultrahigh Rate Capacity and Durable Performance for Sodium-Ion Battery Anode

Xiaochuan Ren, ‡<sup>a,b</sup> Yuanxin Zhao, ‡<sup>a</sup> Qingwei Li,<sup>c</sup> Feng Cheng,<sup>b</sup> Wen Wen,<sup>a</sup> Lili Zhang,<sup>a</sup> Yaobo Huang,<sup>a</sup> Xinhui Xia,<sup>d</sup> Xiaolong Li,<sup>a</sup> Daming Zhu,<sup>\*a</sup> Kaifu Huo,<sup>\*b</sup> and Renzhong Tai<sup>a</sup>

<sup>a</sup> Shanghai Synchrotron Radiation Facility, Shanghai Advanced Research Institute, Chinese Academy of Sciences, Shanghai 201204, China

<sup>b</sup> Wuhan National Laboratory for Optoelectronics (WNLO), Huazhong University of Science and Technology, Luoyu Road 1037, Wuhan 430074, China

<sup>c</sup> Advanced Research Institute for Multidisciplinary Science, Qilu University of Technology (Shandong Academy of Sciences), Jinan 250353, China

<sup>d</sup> State Key Laboratory of Silicon Materials, Key Laboratory of Advanced Materials and Applications for Batteries of Zhejiang Province, Zhejiang University, Hangzhou, 310027, China

\* Corresponding author: zhudaming@zjlab.org.cn; kfhuo@hust.edu.cn

# These authors contributed equally to this work.

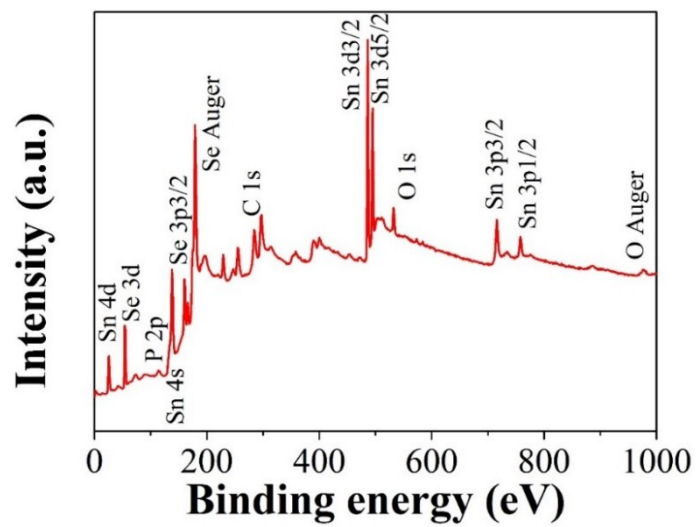

**Fig. S1.** The survey XPS spectrum of SnPSe<sub>3</sub>@G.

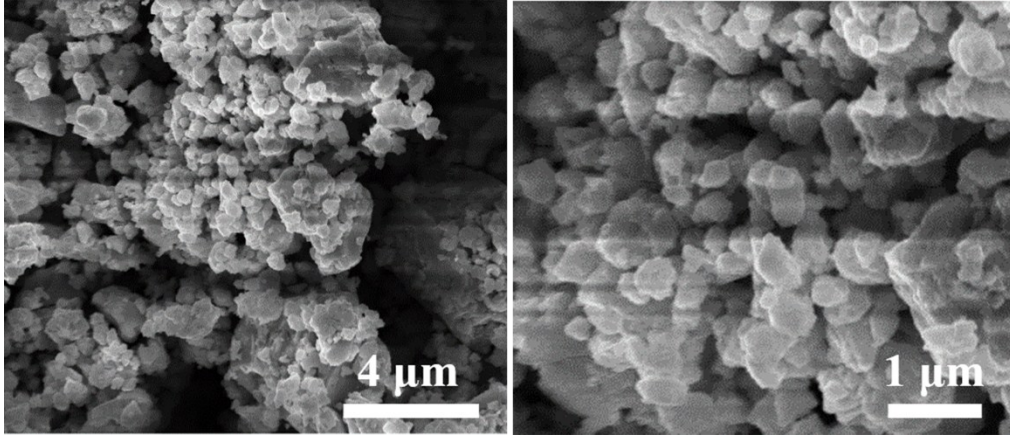

**Fig. S2.** SEM image of SnPSe<sub>3</sub>.

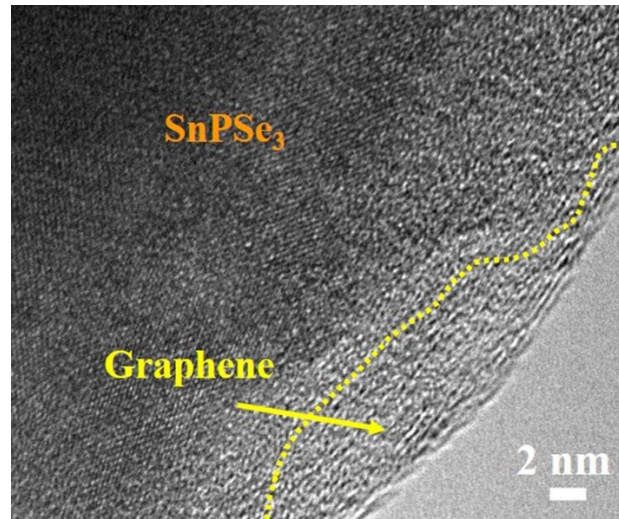

**Fig. S3.** (a) High-magnification TEM image of SnPSe<sub>3</sub>@G composite.

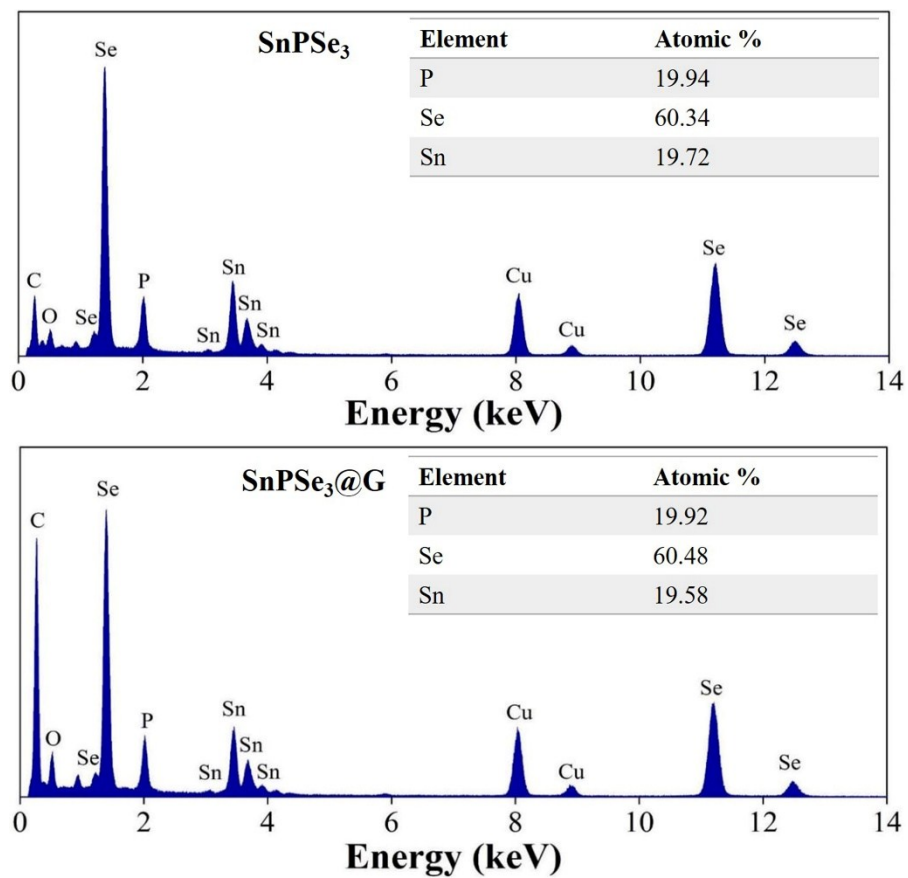

**Fig. S4.** EDX spectra of SnPSe<sub>3</sub> and SnPSe<sub>3</sub>@G.

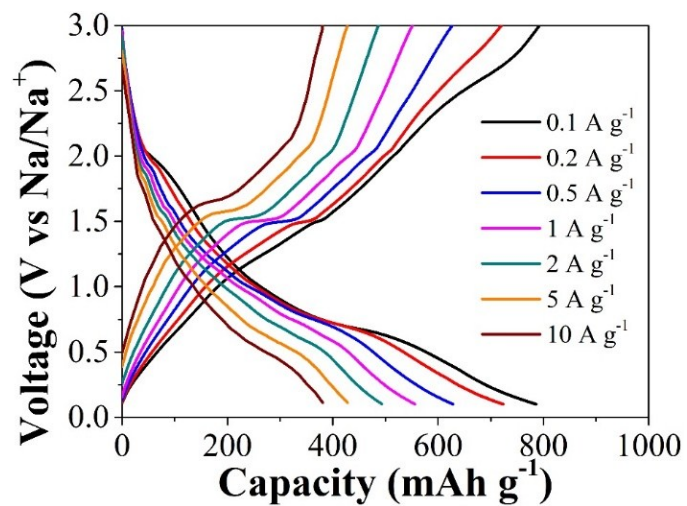

**Fig. S5.** Corresponding charge-discharge curves of SnPSe<sub>3</sub>@G in NSF-M electrolyte at various current densities.

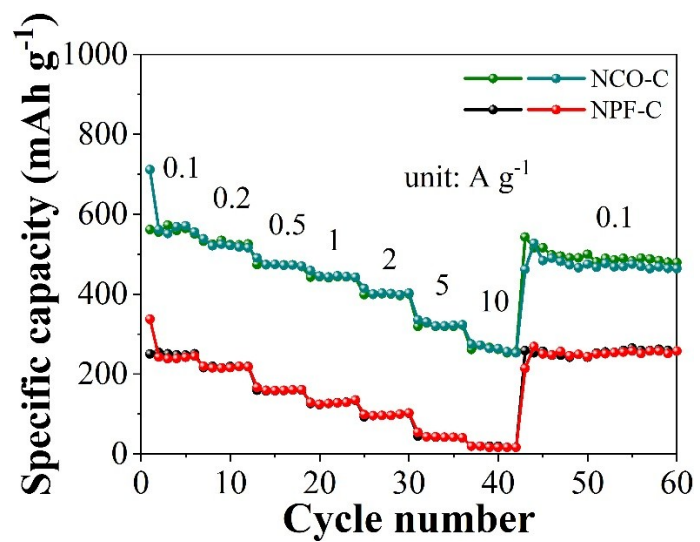

**Fig. S6.** Rate performance of  $\text{SnPSe}_3@\text{G}$  in different electrolytes at a voltage window between 0.1-3.0 V.

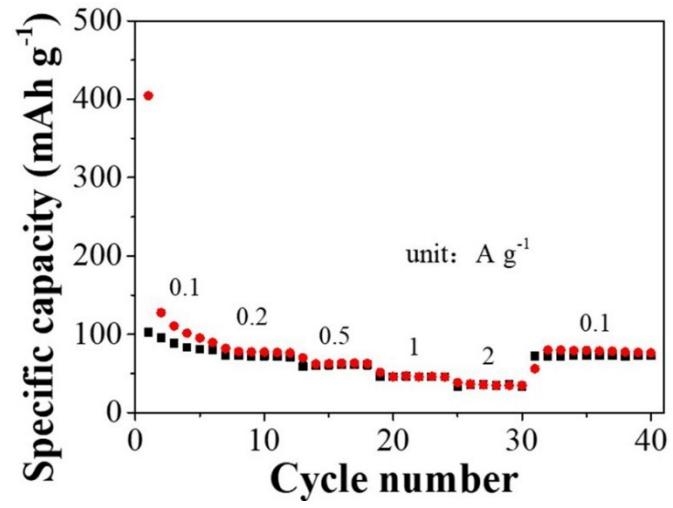

Fig. S7. Rate capability of the graphene electrode.



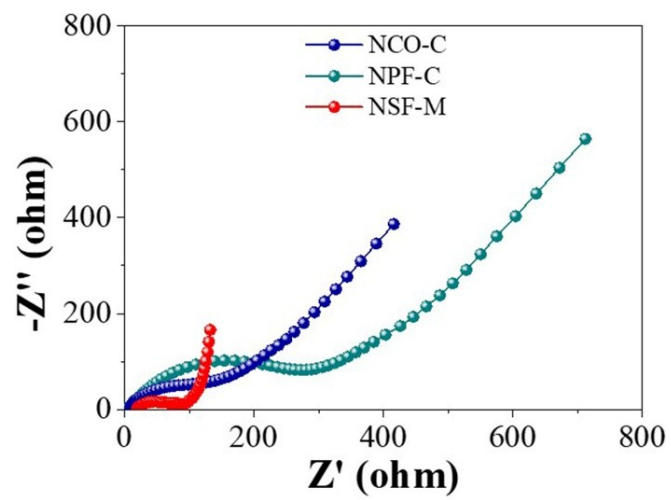

**Fig. S8.** Nyquist plots of SnPSe<sub>3</sub>@G in different electrolytes at the voltage window between 0.1-3.0 V

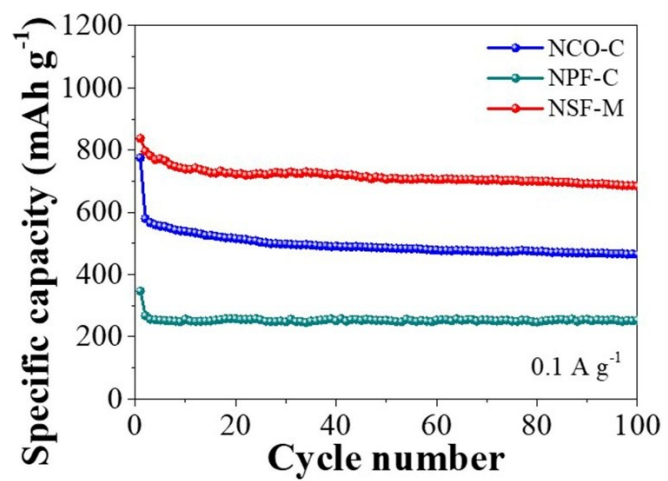

**Fig. S9.** Cycling stabilities of SnPSe<sub>3</sub>@G in different electrolytes at 0.1 A g<sup>-1</sup>.

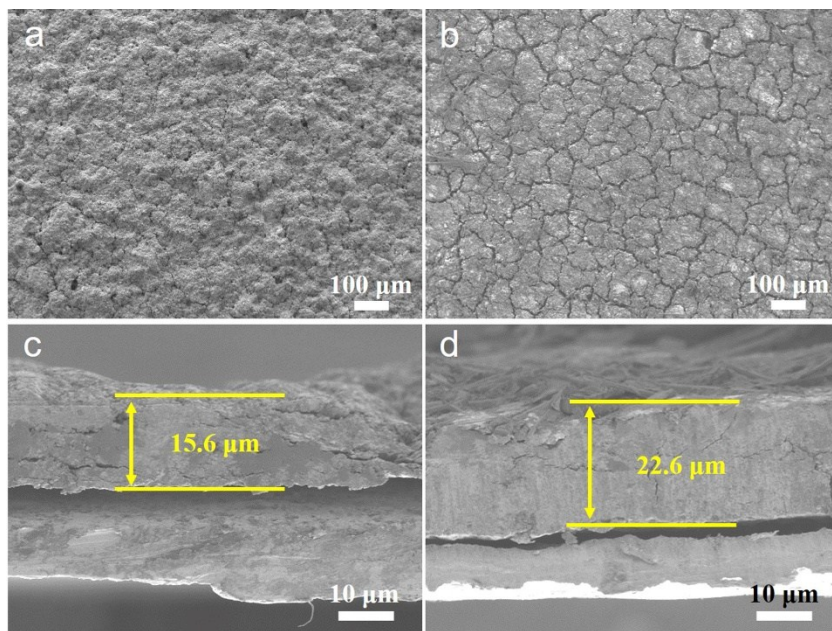

**Fig. S10.** The SEM images of the surface and cross-section morphology of SnPSe<sub>3</sub>@G electrode before (a, c) and after (b, d) 100 cycles at 0.1-3 V.

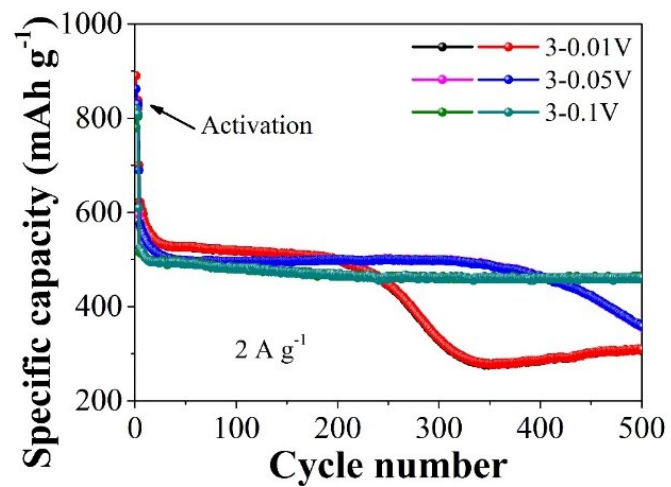

**Fig. S11.** The cycling performance of the SnPSe<sub>3</sub>@G electrode at 2 A g<sup>-1</sup> with the different cut-off voltages in NSF-M electrolyte.

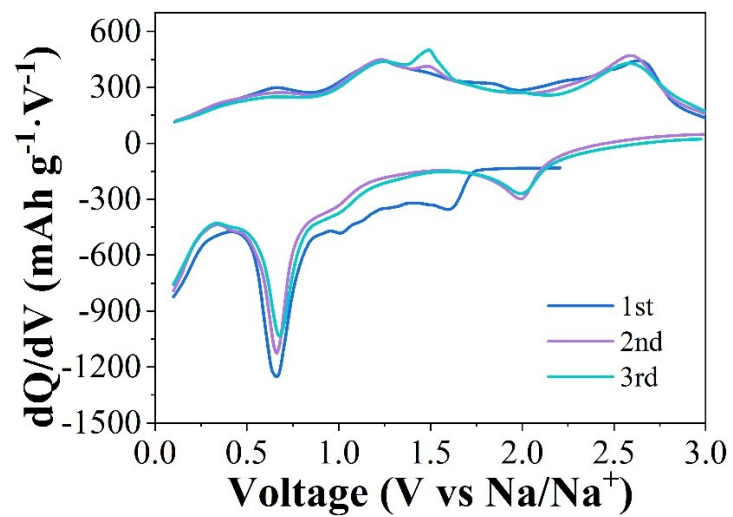

**Fig. S12.** Differential capacity ( $dQ/dV$ ) vs. voltage plots of  $\text{SnPSe}_3@\text{G}$  electrode for the initial three cycles in NSF-M electrolyte.

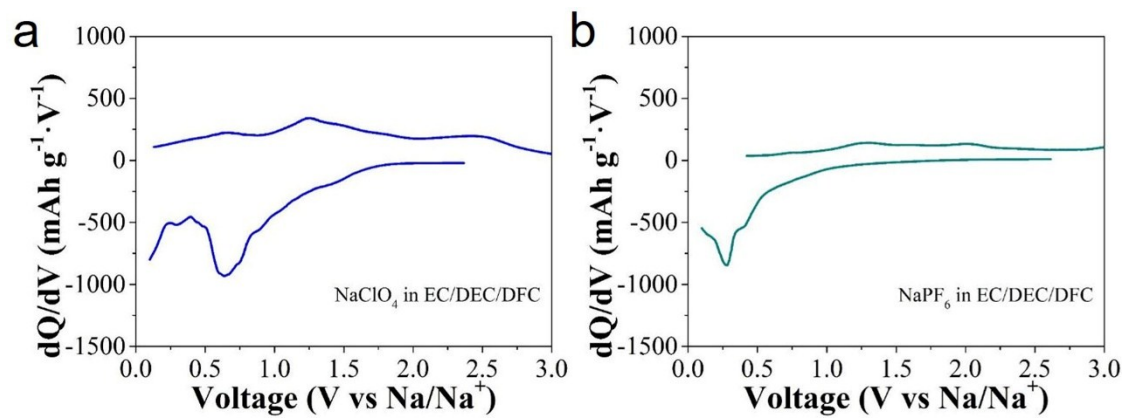

**Fig. S13.** Differential capacity ( $dQ/dV$ ) vs. voltage plots in NCO-C (a) and NPF-C (b) electrolytes.

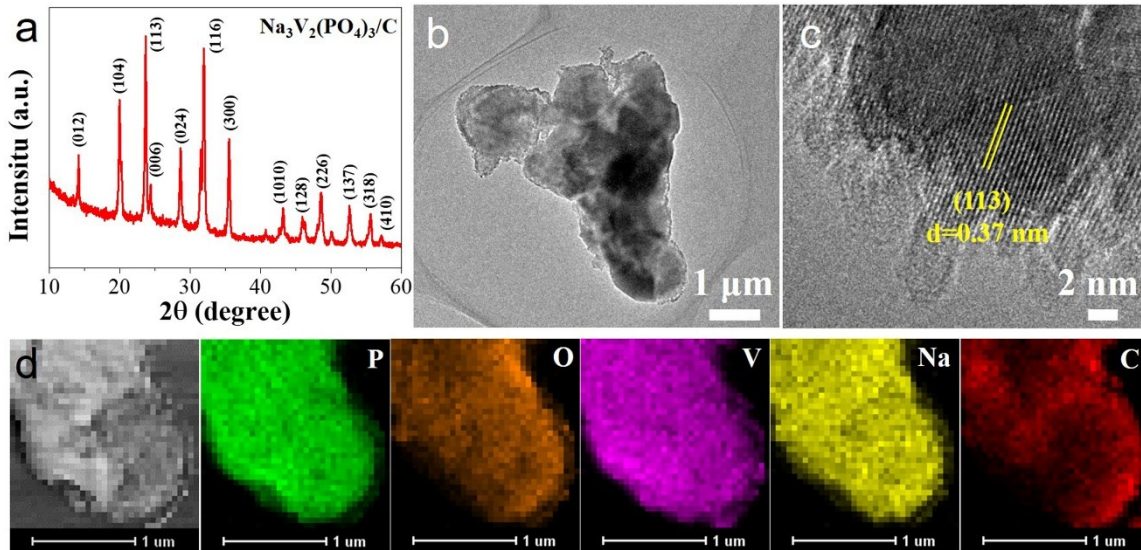

**Fig. S14.** (a) XRD, (b) TEM, (c) HRTEM and (d) EDX mapping of  $\text{Na}_3\text{V}_2(\text{PO}_4)_3/\text{C}$  used as the cathode for sodium full-cell.

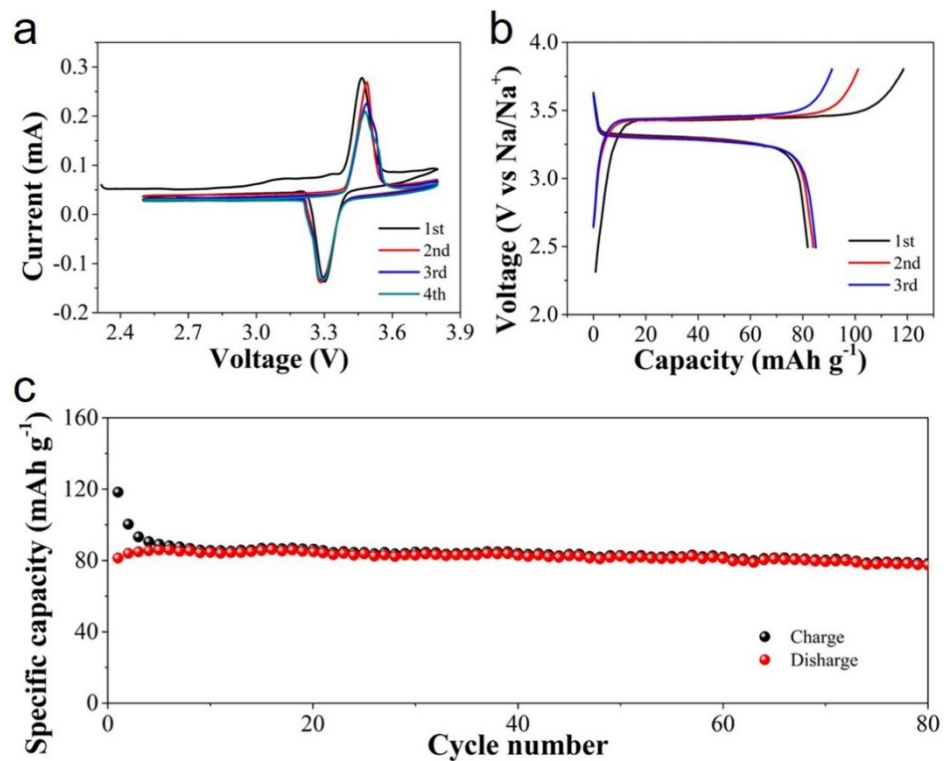

**Fig. S15.** Electrochemical performance of Na<sub>3</sub>V<sub>2</sub>(PO<sub>4</sub>)<sub>3</sub>/C (NVP/C) as a cathode for sodium full-cell. (a) CV curves of the first four cycles at 0.2 mV s<sup>-1</sup> in 2.5-3.8 V. (b) charge/discharge profiles and (c) cycling performance at 0.2 A g<sup>-1</sup> between 2.5-3.8 V.



**Table S1.** The initial coulombic efficiency (ICE) comparisons of SnPSe<sub>3</sub>@G electrode with the reported Sn-, Se- or P-based anodes for SIBs.<sup>a</sup>

| Electrode                                     | Electrolyte                                          | Initial coulombic efficiency | Ref.             |
|-----------------------------------------------|------------------------------------------------------|------------------------------|------------------|
| Sn <sub>4</sub> P <sub>3</sub> @C             | 1 M NaPF <sub>6</sub> in DME                         | 90.7%                        | 1                |
| FeP/C                                         | 1 M NaPF <sub>6</sub> in EC/DEC with 2% FEC          | 68.4%                        | 2                |
| Sandwich-like Ni <sub>2</sub> P               | 1 M NaCF <sub>3</sub> SO <sub>3</sub> in TGM         | 69%                          | 3                |
| SnS <sub>2</sub> @CNTs                        | 1 M NaClO <sub>4</sub> in EC/DEC with 5% FEC.        | 74.3%                        | 4                |
| FeSe <sub>2</sub> @N-doped Carbon             | NaCF <sub>3</sub> SO <sub>3</sub> in diglyme         | 97%                          | 5                |
| MoSe <sub>2</sub> @C                          | 1 M NaClO <sub>4</sub> in PC with 5% FEC             | 75.7%                        | 6                |
| Sn <sub>4</sub> P <sub>3</sub> @porous carbon | 1 M NaPF <sub>6</sub> in EC/DMC with 10% FEC         | 72.5%                        | 7                |
| CoSe <sub>2</sub> @B and N co-doped graphene  | 1 M NaCF <sub>3</sub> SO <sub>3</sub> in DEG/DME     | 68.5%                        | 8                |
| SnS <sub>2</sub> /CNT                         | 1 M NaPF <sub>6</sub> in PC with 2% FEC              | 54%                          | 9                |
| <b>SnPSe<sub>3</sub>@G</b>                    | <b>1 M NaCF<sub>3</sub>SO<sub>3</sub> in diglyme</b> | <b>95%</b>                   | <b>This work</b> |

<sup>a</sup> DME: 1,2-Dimethoxyethane. EC: ethylene carbonate. DEC: diethylene carbonate. FEC: fluoroethylene carbonate. TGM: tetraethylene glycol dimethyl ether. PC: propylene carbonate. DMC: dimethyl carbonate. DEG: diethylene glycol.

## References

1. X. Fan, T. Gao, C. Luo, F. Wang, J. Hu and C. Wang, *Nano Energy*, 2017, **38**, 350-357.
2. Y. Von Lim, S. Huang, Y. Zhang, D. Kong, Y. Wang, L. Guo, J. Zhang, Y. Shi, T. P. Chen, L. K. Ang and H. Y. Yang, *Energy Storage Mater.*, 2018, **15**, 98-107.
3. C. Dong, L. Guo, Y. He, C. Chen, Y. Qian, Y. Chen and L. Xu, *Energy Storage Mater.*, 2018, **15**, 234-241.
4. Y. Liu, X.-Y. Yu, Y. Fang, X. Zhu, J. Bao, X. Zhou and X. W. Lou, *Joule*, 2018, **2**, 725-735.
5. P. Ge, H. Hou, S. Li, L. Yang and X. Ji, *Adv. Funct. Mater.*, 2018, **28**, 1801765.
6. P. Ge, H. Hou, C. E. Banks, C. W. Foster, S. Li, Y. Zhang, J. He, C. Zhang and X. Ji, *Energy Storage Mater.*, 2018, **12**, 310-323.
7. L. Ran, I. Gentle, T. Lin, B. Luo, N. Mo, M. Rana, M. Li, L. Wang and R. Knibbe, *J. Power Sources*, 2020, **461**, 228116.
8. H. Tabassum, C. Zhi, T. Hussain, T. Qiu, W. Aftab and R. Zou, *Adv. Energy Mater.*, 2019, **9**, 1901778.
9. Z. Liu, A. Daali, G. L. Xu, M. Zhuang, X. Zuo, C. J. Sun, Y. Liu, Y. Cai, M. D. Hossain, H. Liu, K. Amine and Z. Luo, *Nano Lett.*, 2020, DOI: 10.1021/acs.nanolett.0c00964.
